# Supplementary material for: Optimization of Bioactive Polyphenols Extraction from Picea Mariana Bark
Source: PubMed Central journal article supplement (PMC6149921; doi:10.3390/molecules22122118), 2017-12-01

Supplementary Material

Table S1. ANOVA and contrasts statistical experiments, GLM procedure on SAS software. Pr>F, the level of significance, has to reach 0.05 (for  $\alpha=5\%$ ) for the model to be statistically significant. Contrasts are calculated if ANOVA is significant.

Yield dataset

| Source                 | DF | Sum of Squares | Mean Square | F Value | Pr > F |
|------------------------|----|----------------|-------------|---------|--------|
| <b>Model</b>           | 17 | 264.8631472    | 15.5801851  | 90.48   | <.0001 |
| <b>Error</b>           | 18 | 3.0995500      | 0.1721972   |         |        |
| <b>Corrected Total</b> | 35 | 267.9626972    |             |         |        |

| R-Square | Coeff Var | Root MSE | yield Mean |
|----------|-----------|----------|------------|
| 0.988433 | 2.639783  | 0.414967 | 15.71972   |

| Source                 | DF | Type I SS   | Mean Square | F Value | Pr > F |
|------------------------|----|-------------|-------------|---------|--------|
| <b>time</b>            | 2  | 1.6524056   | 0.8262028   | 4.80    | 0.0214 |
| <b>ratio</b>           | 2  | 153.7944056 | 76.8972028  | 446.56  | <.0001 |
| <b>time*ratio</b>      | 4  | 0.6274611   | 0.1568653   | 0.91    | 0.4786 |
| <b>temp</b>            | 1  | 108.0560250 | 108.0560250 | 627.51  | <.0001 |
| <b>time*temp</b>       | 2  | 0.2605500   | 0.1302750   | 0.76    | 0.4836 |
| <b>ratio*temp</b>      | 2  | 0.2668167   | 0.1334083   | 0.77    | 0.4756 |
| <b>time*ratio*temp</b> | 4  | 0.2054833   | 0.0513708   | 0.30    | 0.8752 |

Polyphenol content dataset

| Source                 | DF | Sum of Squares | Mean Square | F Value | Pr > F |
|------------------------|----|----------------|-------------|---------|--------|
| <b>Model</b>           | 17 | 19374.38000    | 1139.66941  | 2.39    | 0.0373 |
| <b>Error</b>           | 18 | 8572.19000     | 476.23278   |         |        |
| <b>Corrected Total</b> | 35 | 27946.57000    |             |         |        |

| R-Square | Coeff Var | Root MSE | poly Mean |
|----------|-----------|----------|-----------|
| 0.693265 | 4.750446  | 21.82276 | 459.3833  |

| Source       | DF | Type I SS   | Mean Square | F Value | Pr > F |
|--------------|----|-------------|-------------|---------|--------|
| <b>time</b>  | 2  | 1335.255000 | 667.627500  | 1.40    | 0.2718 |
| <b>ratio</b> | 2  | 5180.901667 | 2590.450833 | 5.44    | 0.0142 |

|                        |   |             |             |      |        |
|------------------------|---|-------------|-------------|------|--------|
| <b>time*ratio</b>      | 4 | 558.558333  | 139.639583  | 0.29 | 0.8785 |
| <b>temp</b>            | 1 | 1181.067778 | 1181.067778 | 2.48 | 0.1327 |
| <b>time*temp</b>       | 2 | 1891.987222 | 945.993611  | 1.99 | 0.1661 |
| <b>ratio*temp</b>      | 2 | 1895.333889 | 947.666944  | 1.99 | 0.1657 |
| <b>time*ratio*temp</b> | 4 | 7331.276111 | 1832.819028 | 3.85 | 0.0198 |

DPPH activity dataset

| Source                 | DF | Sum of Squares | Mean Square | F Value | Pr > F |
|------------------------|----|----------------|-------------|---------|--------|
| <b>Model</b>           | 17 | 84790.8056     | 4987.6944   | 1.07    | 0.4397 |
| <b>Error</b>           | 18 | 83595.5000     | 4644.1944   |         |        |
| <b>Corrected Total</b> | 35 | 168386.3056    |             |         |        |

Proanthocyanidin content dataset

| Source                 | DF | Sum of Squares | Mean Square | F Value | Pr > F |
|------------------------|----|----------------|-------------|---------|--------|
| <b>Model</b>           | 17 | 4088.830000    | 240.519412  | 1.36    | 0.2639 |
| <b>Error</b>           | 18 | 3193.640000    | 177.424444  |         |        |
| <b>Corrected Total</b> | 35 | 7282.470000    |             |         |        |

Sugar content dataset

| Source                 | DF | Sum of Squares | Mean Square | F Value | Pr > F |
|------------------------|----|----------------|-------------|---------|--------|
| <b>Model</b>           | 17 | 54528.58250    | 3207.56368  | 3.12    | 0.0106 |
| <b>Error</b>           | 18 | 18488.88500    | 1027.16028  |         |        |
| <b>Corrected Total</b> | 35 | 73017.46750    |             |         |        |

| R-Square | Coeff Var | Root MSE | sucr Mean |
|----------|-----------|----------|-----------|
| 0.746788 | 5.437391  | 32.04934 | 589.4250  |

| Source                 | DF | Type I SS   | Mean Square | F Value | Pr > F |
|------------------------|----|-------------|-------------|---------|--------|
| <b>time</b>            | 2  | 2984.81167  | 1492.40583  | 1.45    | 0.2600 |
| <b>ratio</b>           | 2  | 12953.50167 | 6476.75083  | 6.31    | 0.0084 |
| <b>time*ratio</b>      | 4  | 15407.39167 | 3851.84792  | 3.75    | 0.0218 |
| <b>temp</b>            | 1  | 230.53361   | 230.53361   | 0.22    | 0.6414 |
| <b>time*temp</b>       | 2  | 5164.22056  | 2582.11028  | 2.51    | 0.1089 |
| <b>ratio*temp</b>      | 2  | 1489.49389  | 744.74694   | 0.73    | 0.4979 |
| <b>time*ratio*temp</b> | 4  | 16298.62944 | 4074.65736  | 3.97    | 0.0177 |

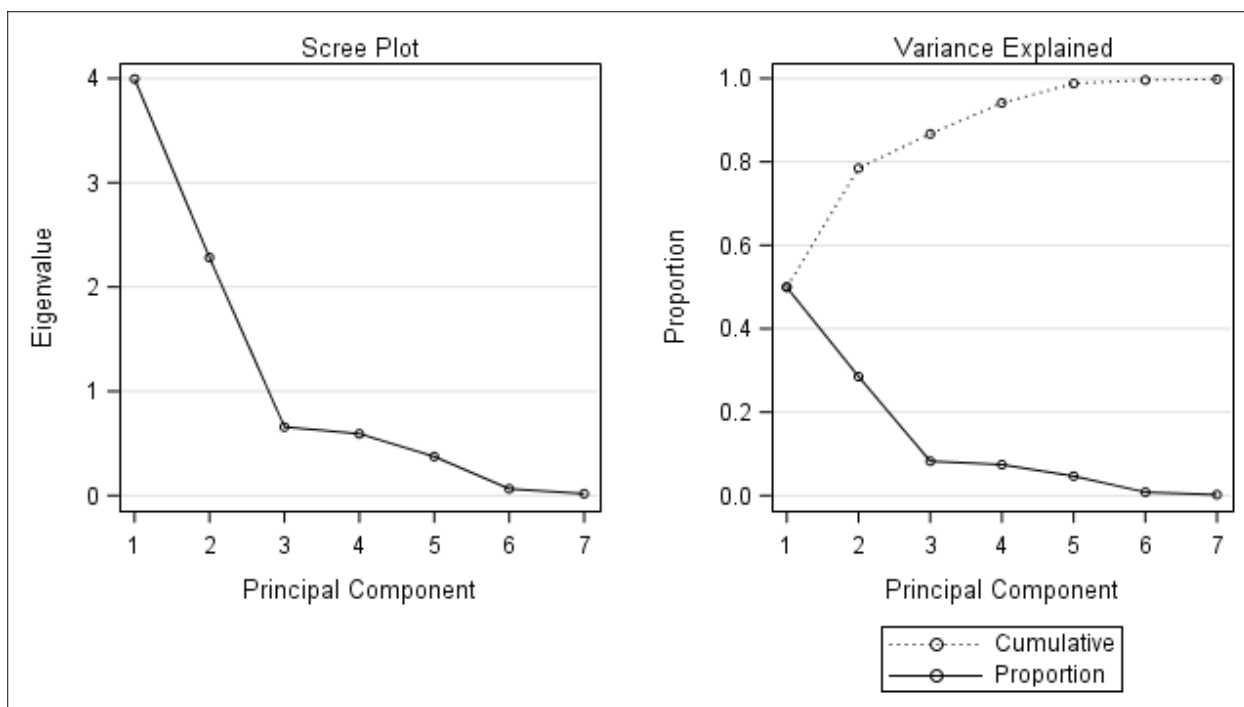

Figure S1: Variance explained for the principal component analysis

Table S2. Pearson correlation coefficients and p values from statistical significance testing (in italics).

| Compound | PC1                         | PC2                         | PC3                       |
|----------|-----------------------------|-----------------------------|---------------------------|
| 1        | 0.14514<br><i>0.3983</i>    | 0.96254<br><i>0.6483</i>    | 0.07868<br><i>0.6483</i>  |
| 2        | 0.28258<br><i>0.0949</i>    | 0.93507<br><i>&lt;.0001</i> | 0.14035<br><i>0.4142</i>  |
| 3        | 0.72520<br><i>&lt;.0001</i> | -0.35307<br><i>0.0347</i>   | 0.09313<br><i>0.5890</i>  |
| 4        | 0.86412<br><i>&lt;.0001</i> | 0.02864<br><i>0.8683</i>    | -0.42546<br><i>0.0097</i> |
| 5        | 0.89105<br><i>&lt;.0001</i> | -0.31833<br><i>0.0585</i>   | -0.03004<br><i>0.8619</i> |
| 6        | 0.62628<br><i>&lt;.0001</i> | -0.35908<br><i>0.0315</i>   | 0.59194<br><i>0.0001</i>  |
| 7        | 0.87583<br><i>&lt;.0001</i> | 0.05693<br><i>0.7416</i>    | -0.25692<br><i>0.1304</i> |
| 8        | 0.81732<br><i>&lt;.0001</i> | 0.15916<br><i>0.3538</i>    | 0.15916<br><i>0.3538</i>  |

## Supplementary Material – NMR

NMR shifts ( $^1\text{H}$  and  $^{13}\text{C}$ ) of compounds 1, 2, 3, 4, 5, 7 and 8.

***trans-p-coumaric acid  $\beta$ -D-glucopyranoside (1)*** :  $^1\text{H}$  NMR (500 MHz,  $\text{CD}_3\text{OD}$ )  $\delta$  7.64 (d,  $J = 15.9$  Hz, H-7), 7.56 (d,  $J = 8.8$  Hz, H-2/6), 7.13 (d,  $J = 8.8$  Hz, H-3), 7.10 (d,  $J = 8.7$ , H-5), 6.38 (d,  $J = 15.9$ , H-8), 4.98 (dd,  $J = 7.4, 5.3$  Hz, H-1'), 3.91- 3.37 (Glucose: 3.91 (dd,  $J = 12.1, 2.2$  Hz, H-6a'), 3.71 (dd,  $J = 12.0, 5.8$  Hz, H-6b'), 3.51 – 3.45 (m, H-2'/3'/5'), 3.43 – 3.37 (m, H-4')).  $^{13}\text{C}$  NMR (126 MHz,  $\text{CD}_3\text{OD}$ )  $\delta$  169.3 (COOD), 159.4 (C-4), 144.5 (C-7), 129.3 (C-2, 6), 128.6 (C-1), 116.5 (C-3, 5), 116.1 (C-8), 100.4 (C-1'), 76.8 (C-5'), 76.5 (C-3'), 73.4 (C-2'), 69.9 (C4'), 61.0 (C6').

***trans-ferulic acid  $\beta$ -D-glucopyranoside (2)***:  $^1\text{H}$  NMR (500 MHz,  $\text{CD}_3\text{OD}$ )  $\delta$  7.62 (d,  $J = 15.9$  Hz, H-7), 7.26 (d,  $J = 1.8$  Hz, H-2), 7.19 (d,  $J = 8.4$  Hz, H-5), 7.16 (dd,  $J = 8.4, 1.8$  Hz, H-6), 6.41 (d,  $J = 15.9$  Hz, H-8), 4.98 (d,  $J = 7.4$  Hz, H-1'), 3.91 (s,  $\text{CH}_3$ ), 3.71- 3.37 (Glucose: 3.70 (dd,  $J = 12.1, 5.3$  Hz, H-6a'), 3.53 (dd,  $J = 9.2, 7.5$  Hz, H-6b'), 3.50-3.38 (m, H-2', 3', 5')).  $^{13}\text{C}$  NMR (126 MHz,  $\text{CD}_3\text{OD}$ )  $\delta$  169.2 (COOD), 149.6 (C-3), 148.6 (C-4), 144.7 (C-7), 129.2 (C-1), 122.0 (C-6), 116.5 (C-8), 115.9 (C-5), 111.0 (C-2), 100.8 (C-1'), 76.9 (C-3'), 76.4 (C-5'), 73.4 (C-2'), 69.8 (C-4'), 61.0 (C-6'), 55.3 ( $\text{CH}_3$ ).

***trans-astringin (3)***:  $^1\text{H}$  NMR (500 MHz,  $\text{DMSO}-d_6$ )  $\delta$  6.97 (d,  $J = 2.1$  Hz, H-10), 6.95 (d,  $J = 16.2$  Hz, H-8), 6.84 (dd,  $J = 8.2, 2.1$  Hz, H-14), 6.77 (d,  $J = 16.2$  Hz, H-7), 6.72 (br d,  $J = 4.8$  Hz, H-13), 6.71 (br s, H-2), 6.56 (t,  $J = 1.6$  Hz, H-6), 6.33 (t,  $J = 2.2$  Hz, H-4), 4.81 (d,  $J = 7.7$  Hz, H-1'), 3.72-3.16 (Glucose: 3.72 (d,  $J = 9.6$  Hz, H-6a'), 3.55-3.16 (m, 5H)).  $^{13}\text{C}$  NMR (126 MHz,  $\text{DMSO}-d_6$ )  $\delta$  159.3 (C-3), 158.8 (C-5), 146.1 (C-12), 145.8 (C-11), 139.8 (C-9), 129.4 (C-1), 128.9 (C-8), 125.5 (C-7), 119.2 (C-14), 116.1 (C-13), 113.8 (C-10), 107.5 (C-6), 105.2 (C-2), 103.2 (C-4), 101.1 (C-1'), 77.5 (C-5'), 77.1 (C-3'), 73.7 (C-2'), 70.2 (C-4'), 61.2 (C-6').

***trans-piceid (4)***:  $^1\text{H}$  NMR (500 MHz,  $\text{DMSO}-d_6$ )  $\delta$  7.39 (d,  $J = 8.1$  Hz, H-10, 14), 7.02 (d,  $J = 16.4$  Hz, H-8), 6.88 (d,  $J = 16.3$  Hz, H-7), 6.75 (d,  $J = 8.1$  Hz, H-13, 11), 6.72 (d,  $J = 5.5$  Hz, H-2), 6.56 (br s, H-6), 6.33 (br s, H-4), 4.80 (d,  $J = 7.7$ , H-1'), 3.72– 3.13 (Glucose: 3.72 (d,  $J = 11.7$  Hz, H-6a'), 3.48 (dd,  $J = 11.89, 5.8$  Hz, H-6b'), 3.41-3.13, (m, 4H)).  $^{13}\text{C}$  NMR (126 MHz,  $\text{DMSO}-d_6$ )  $\delta$  159.3 (C-3), 158.8 (C-5), 157.8 (C-12), 147.2 (C-11), 139.8 (C-9), 129.0 (C-1), 128.4 (C-8), 125.6 (C-7), 120.7 (C-14), 116.0 (C-13), 110.3 (C-10), 107.6 (C-6), 105.1 (C-2), 103.2 (C-4), 101.1 (C-1'), 77.6 (C-3'), 77.2 (C-5'), 73.7 (C-2'), 70.2 (C-4'), 61.1 (C-6').

***trans-isorhapontin (5)*** :  $^1\text{H}$  NMR (500 MHz,  $\text{DMSO}-d_6$ )  $\delta$  7.17 (d,  $J = 2.0$  Hz, H-10), 7.02 (d,  $J = 16.3$  Hz, H-8), 6.96 (dd,  $J = 8.2, 2.0$  Hz, H-14), 6.91 (d,  $J = 16.3$  Hz, H-7), 6.75 (d,  $J = 8.1$  Hz, H-13), 6.74 (t,  $J = 1.7$  Hz, H-2), 6.56 (t,  $J = 1.7$  Hz, H-6), 6.33 (t,  $J = 2.2$  Hz, H-4), 4.80 (d,

$J = 7.6$  Hz, H-1'), 3.82 (s, CH<sub>3</sub>O), 5.30-3.16 (Glucose : 5.30 – 5.25 (m, OH-3'), 5.09 (s, OH-2'), 5.05 – 4.99 (m, OH-4'), 4.63 (t,  $J = 5.6$  Hz, OH-6'), 3.72 (m, H-6a'), 3.48 (dd,  $J = 11.6, 5.6$  Hz, H-6b'), 3.26 (d,  $J = 8.8$  Hz, H-3'), 3.16 (d,  $J = 2.7$  Hz, H-4'), 4.63 (t,  $J = 5.6$  Hz, OH-6')). <sup>13</sup>C NMR (126 MHz, DMSO-*d*<sub>6</sub>)  $\delta$  159.3 (C-3), 158.8 (C-5), 148.2 (C-11), 147.1 (C-12), 139.8 (C-9), 129.3 (C-1), 129.0 (C-8), 126.0 (C-7), 120.7 (C-14), 116.0 (C-13), 110.3 (C-10), 107.7 (C-6), 105.1 (C-2), 103.2 (C-4), 101.1 (C-1'), 77.6 (C-5'), 77.1 (C-3'), 73.7 (C-2'), 70.2 (C-4'), 61.2 (C-6'), 56.1 (CH<sub>3</sub>O).

***trans-resveratrol* (7):** <sup>1</sup>H NMR (500 MHz, DMSO-*d*<sub>6</sub>)  $\delta$  9.56 (s, OH-12), 9.20 (s, OH-3, OH-5), 7.39 (d,  $J = 8.5$  Hz, H-10, H-14), 6.92 (d,  $J = 16.3$  Hz, H-8), 6.81 (d,  $J = 16.3$  Hz, H-7), 6.75 (d,  $J = 8.5$  Hz, H-11, H-13), 6.38 (d,  $J = 2.2$  Hz, H-2, H-6), 6.11 (t,  $J = 2.1$  Hz, H-4). <sup>13</sup>C NMR (126 MHz, DMSO-*d*<sub>6</sub>)  $\delta$  158.9 (C-3,5), 157.6 (C-12), 139.7 (C-9), 128.5 (C-1), 128.3 (C-10,14,8 overlapping), 126.1 (C-7), 115.9 (C-11, 13), 104.7 (C-2,6), 102.2 (C-4).

***trans-isorhapontigenin* (8):** <sup>1</sup>H NMR (500 MHz, DMSO-*d*<sub>6</sub>)  $\delta$  7.17 (d,  $J = 2.0$  Hz, H-10), 6.95 (dd,  $J = 8.2, 2.0$  Hz, H-14), 6.92 (d,  $J = 16.0$  Hz, H-8), 6.86 (d,  $J = 16.3$  Hz, H-7), 6.74 (d,  $J = 8.0$  Hz, H-13), 6.38 (d,  $J = 2.2$  Hz, H-2, 6), 6.11 (t,  $J = 2.2$  Hz, H-4), 3.82 (s, CH<sub>3</sub>O). <sup>13</sup>C NMR (126 MHz, DMSO-*d*<sub>6</sub>)  $\delta$  158.9 (C-3), 158.7 (C-5), 148.2 (C-11), 147.0 (C-12), 139.7 (C-9), 129.8 (C-1), 129.0 (C-8), 126.3 (C-7), 120.6 (C-14), 115.9 (C-13), 110.3 (C-10), 106.8 (C-6), 104.7 (C-2), 102.2 (C-4), 56.1 (CH<sub>3</sub>O).

Figure S2. <sup>1</sup>H NMR of compound 6.

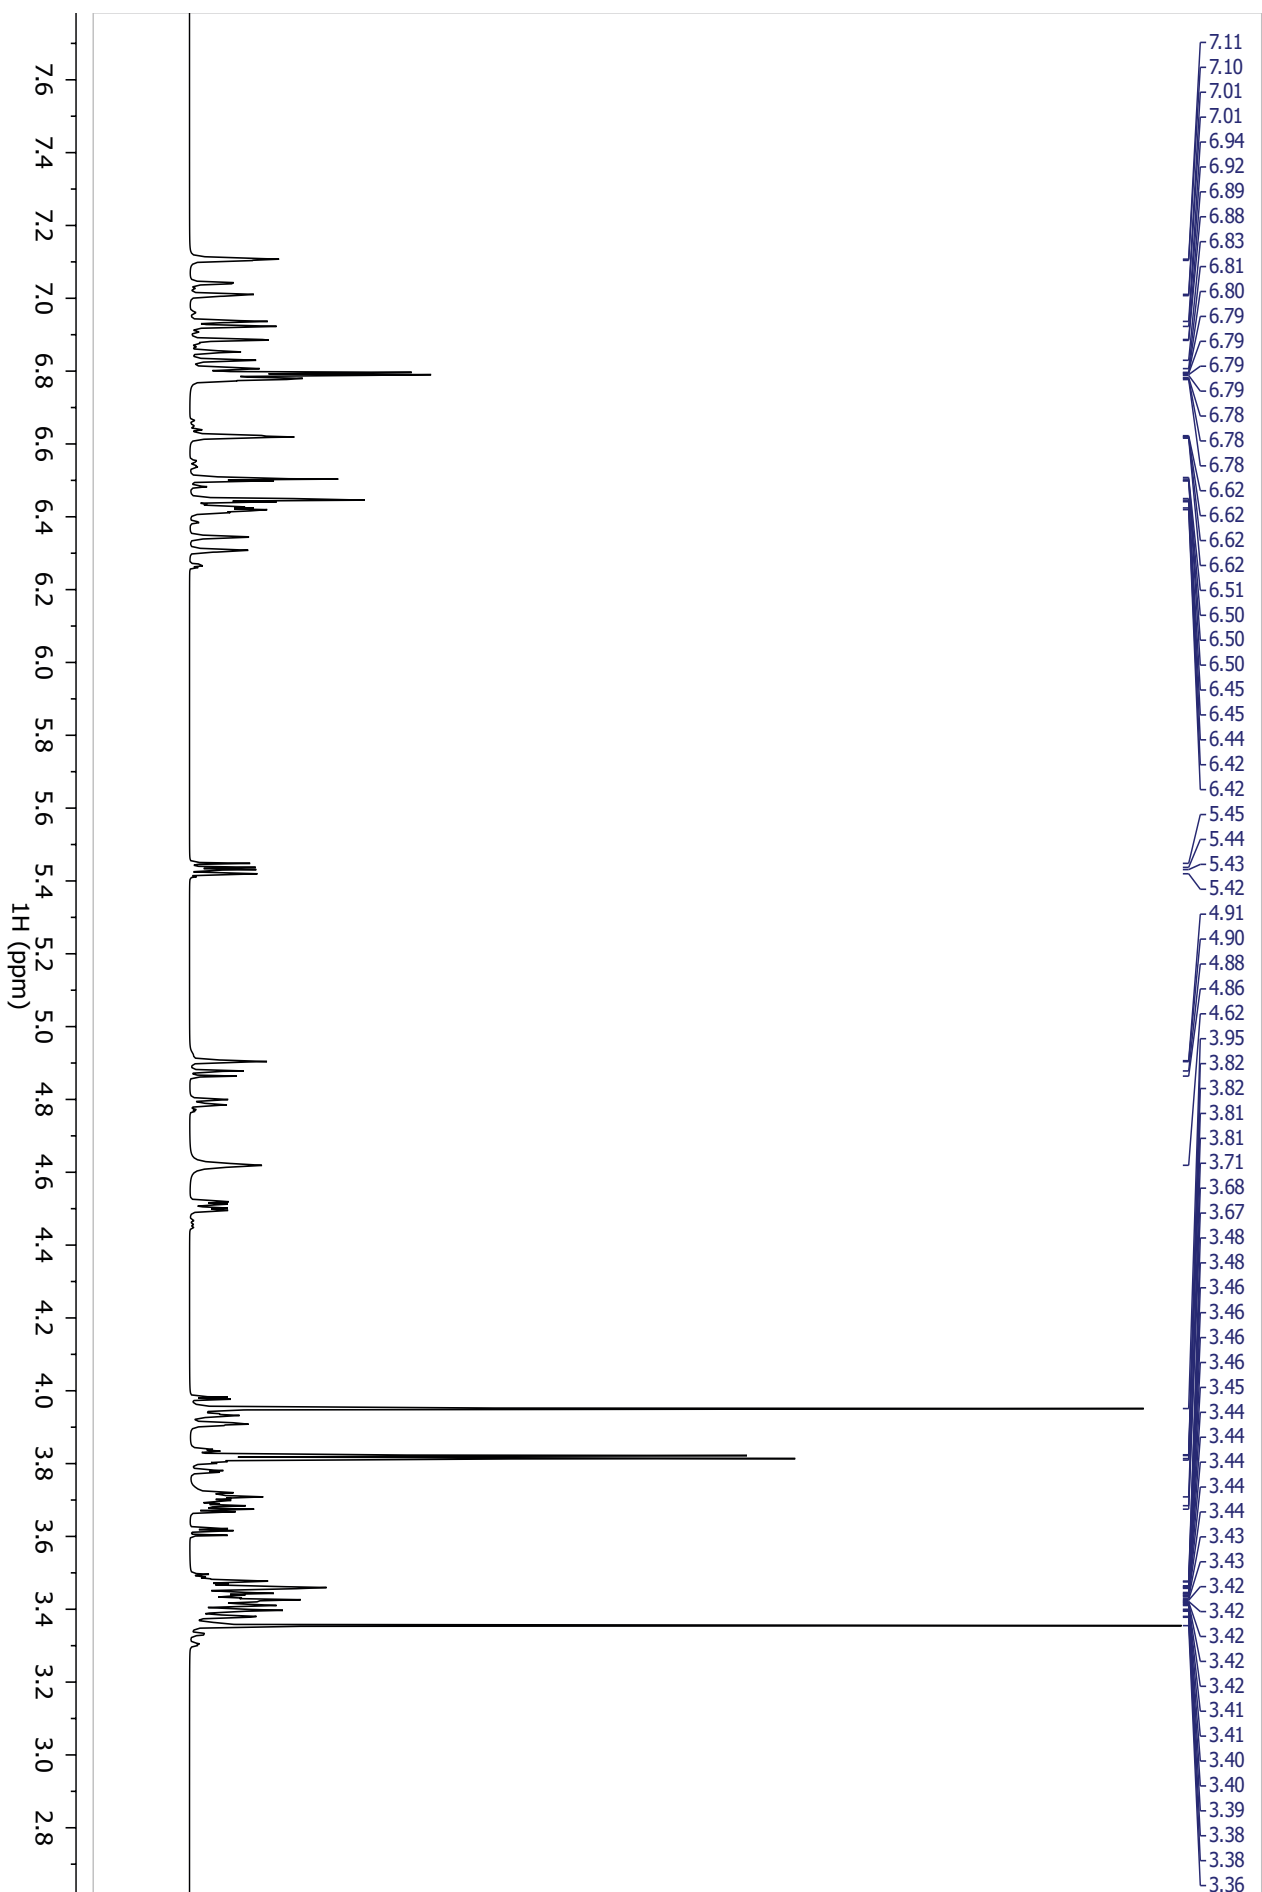

Figure S3. <sup>13</sup>C NMR of compound 6.

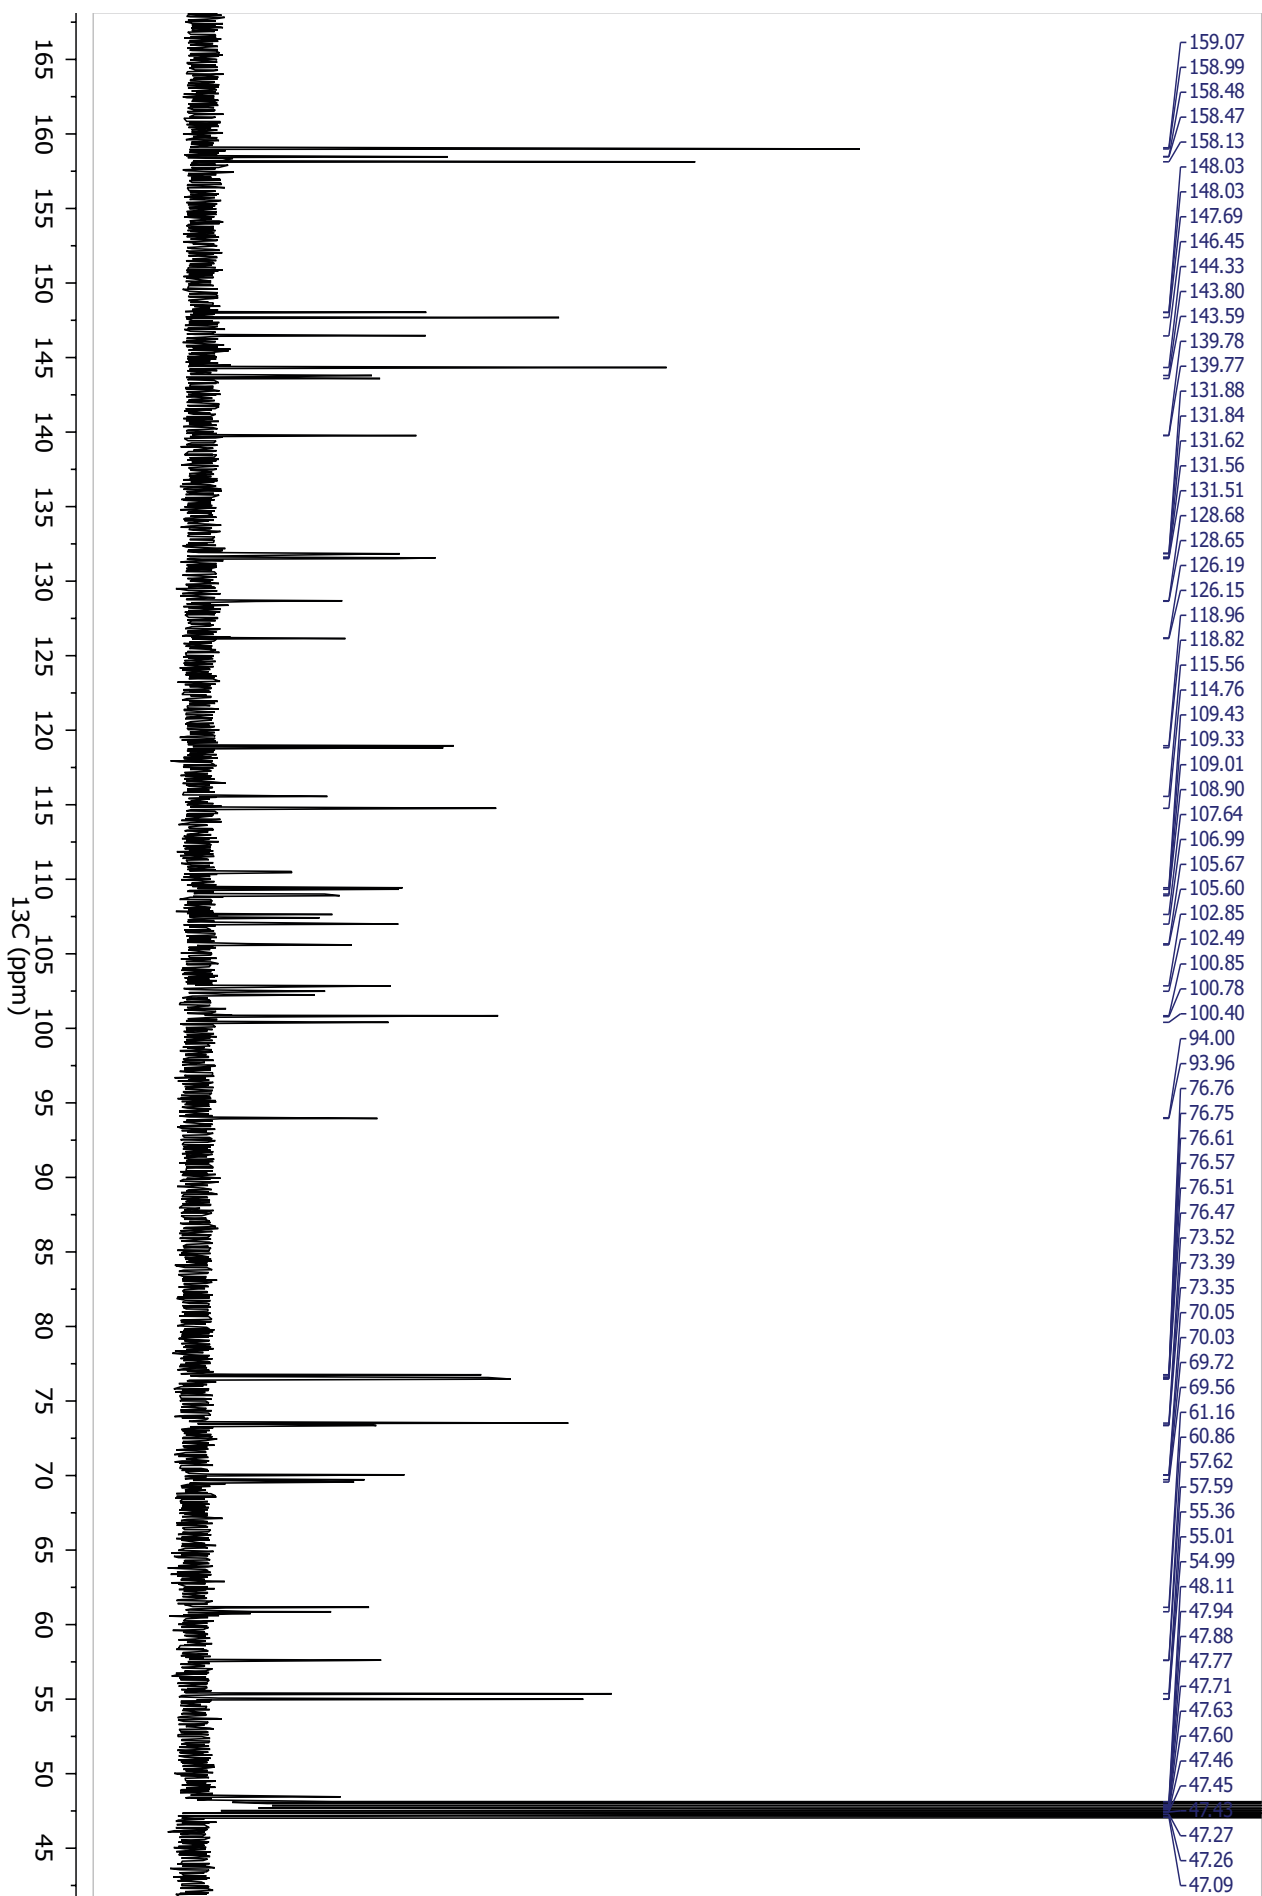

Figure S4. HSQC NMR of compound 6.

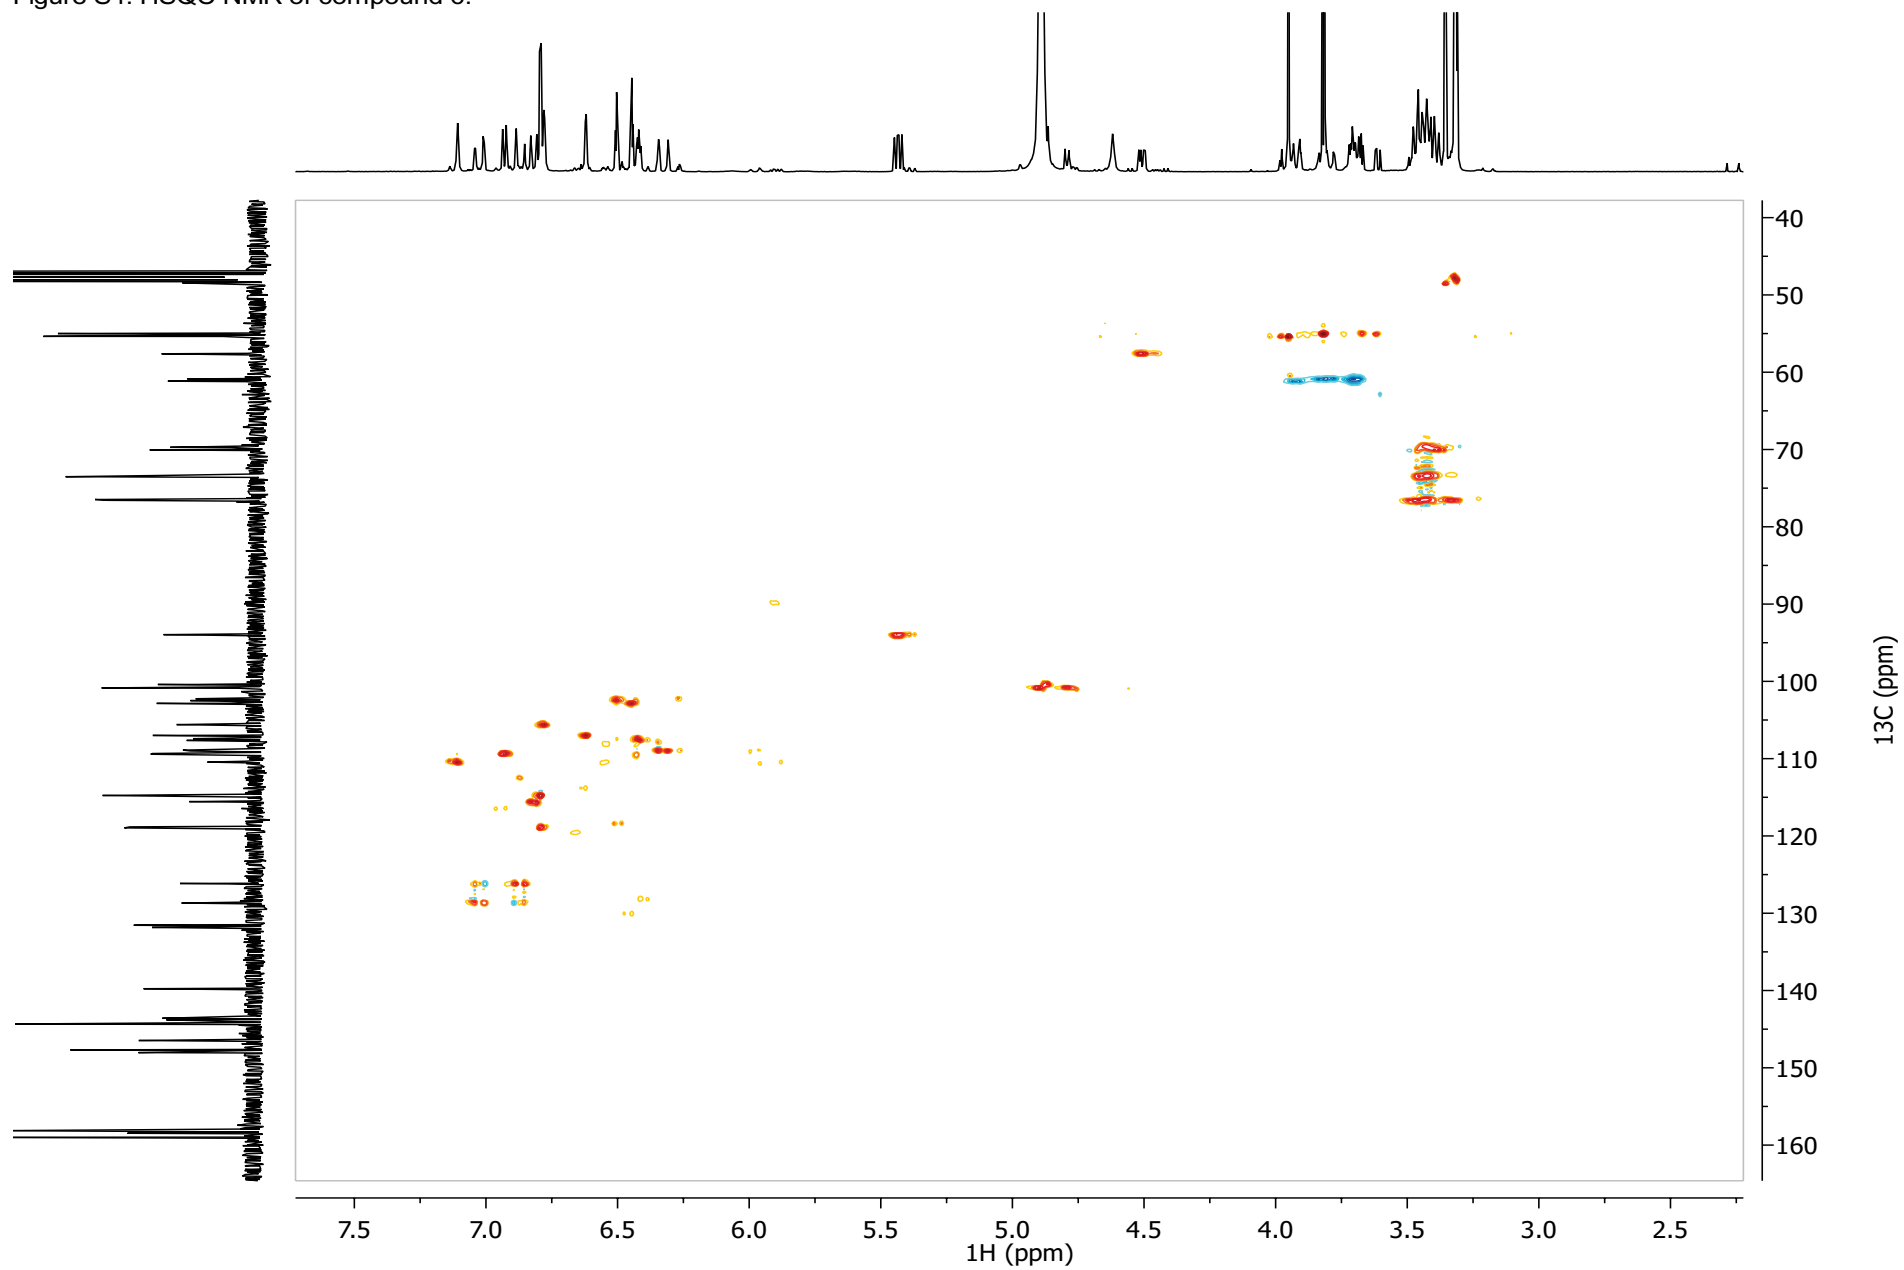



Figure S5. HMBC NMR of compound 6.

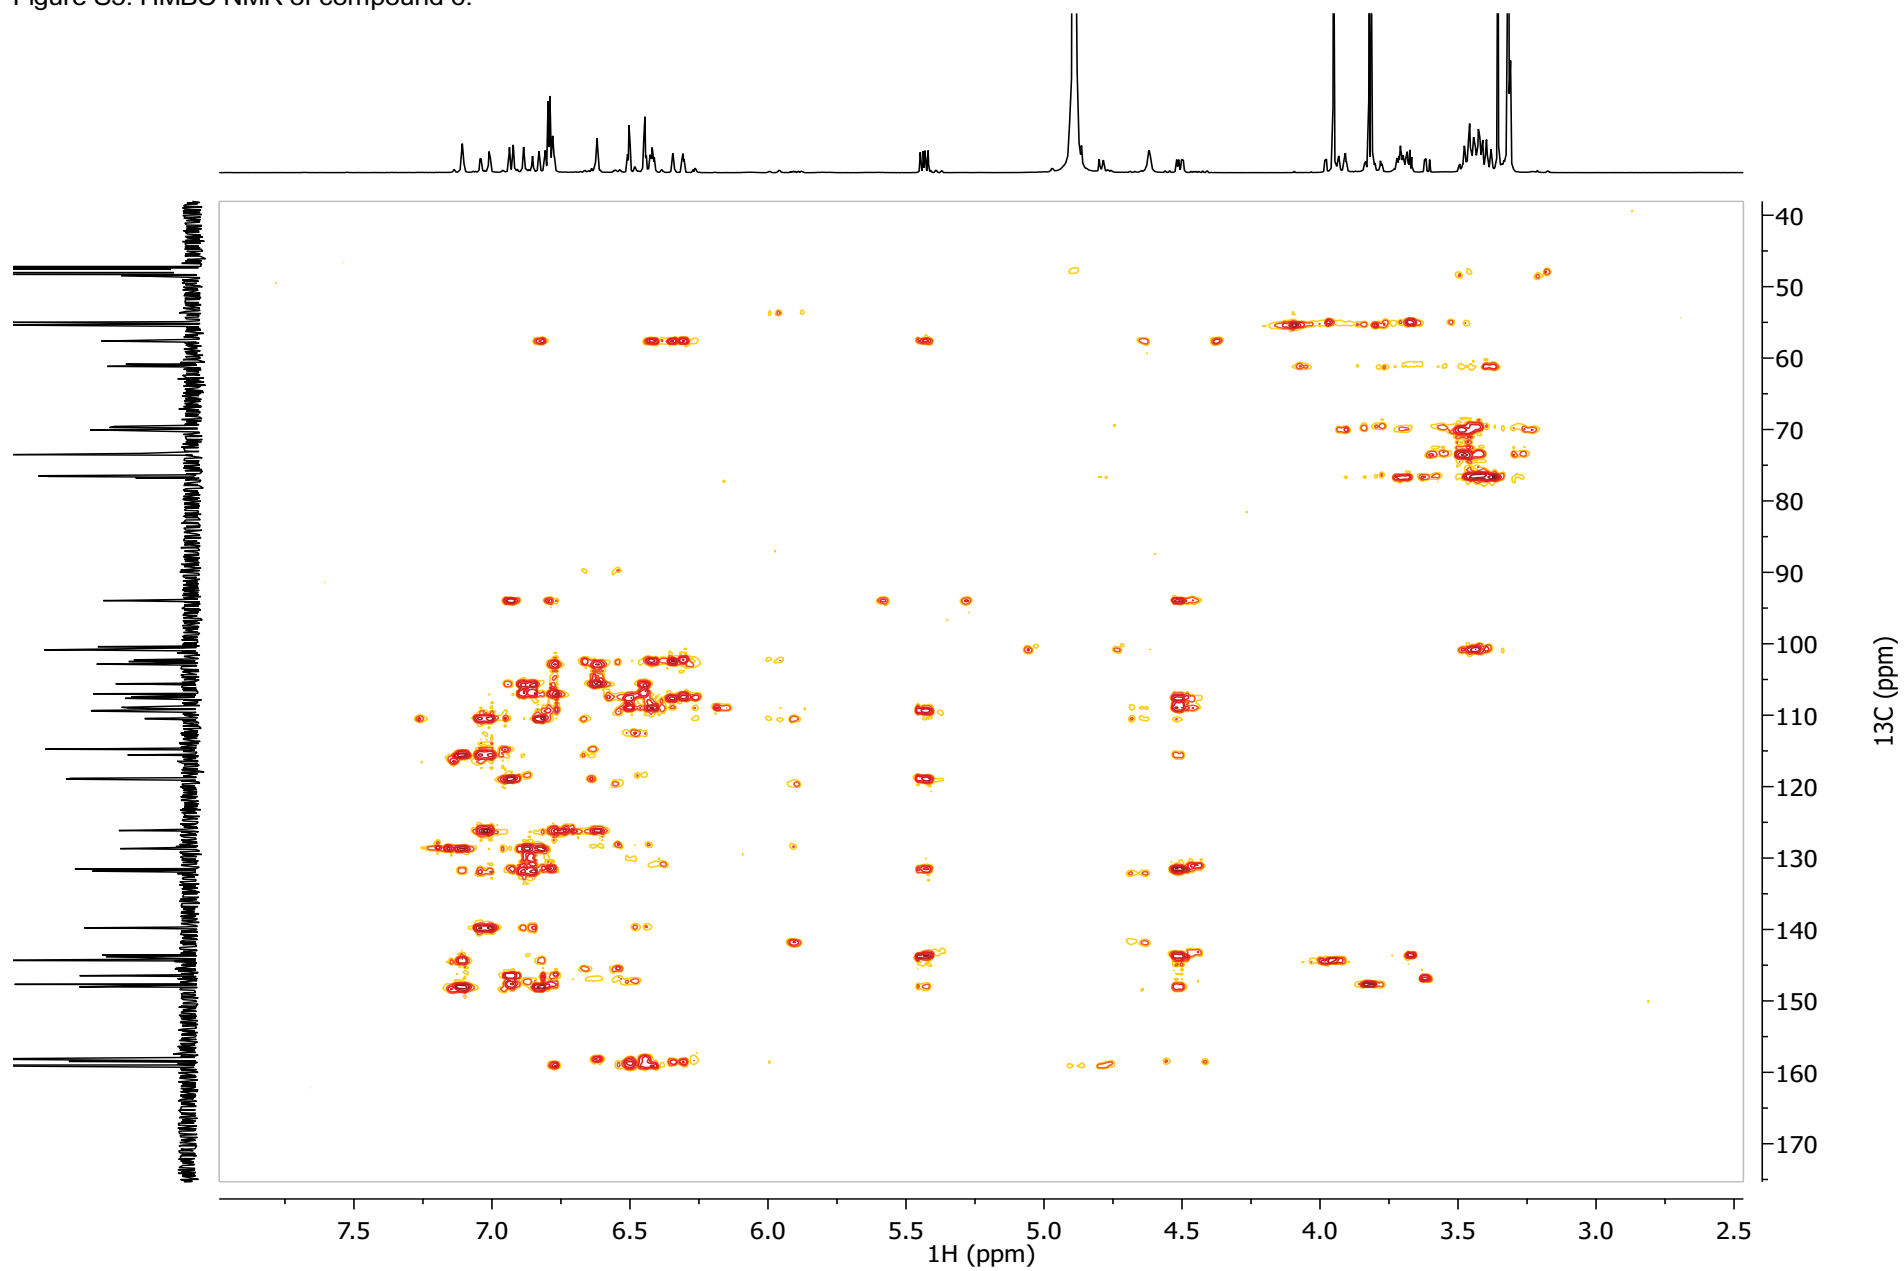

Supplement: molecules-22-02118-s001.pdf [file molecules-22-02118-s001.pdf]
